# Supplementary material for: Genomic tagging of endogenous human ESCRT-I complex preserves ESCRT-mediated membrane-remodeling functions
Source: PubMed Central journal article supplement (PMC6827313; doi:10.1074/jbc.ra119.009372), 2019-09-13

**Supplementary Figures**

**Genomic tagging of endogenous human ESCRT-I complex preserves ESCRT-mediated membrane remodeling functions**

**Huxley K. Hoffman<sup>1</sup>, Melissa V. Fernandez<sup>2</sup>, Nicholas S. Groves<sup>1</sup>, Eric O. Freed<sup>2</sup>, Schuyler B. van Engelenburg<sup>1\*</sup>**

<sup>1</sup> Molecular and Cellular Biophysics Program, Department of Biological Sciences, University of Denver, Denver, CO 80210, USA

<sup>2</sup> Virus-Cell Interaction Section, HIV Dynamics and Replication Program, Center for Cancer Research, National Cancer Institute, Frederick, MD 21702, USA

**(A) Tsg101 sgRNA target site**

|                                                              |               |
|--------------------------------------------------------------|---------------|
| M A V S E S Q L K K M V *S K                                 | Tsg101 exon 1 |
| cggccgtcatggcgggtgtcggagagccagctcaagaaaatggtgt*ccaagtgaggctg | genomic DNA   |
| <u>GCTCAAGAAAATGGTGT*CCAAGG</u>                              | sgRNA         |

**(B) GFP-Tsg101 HDR template sequence**

5' homology region, PuroR, P2A, EGFP, 3' homology region (with silent mutations)

Gggtgggtacagaggagaaattctgacttacggaatgatttctcggagaagaattactatctggcttcttgtgaaacaaagctctacacttta  
 cccttgccaacgtatagatgaaggtctttaagcttaaaaaaatcattaatagaggaccactgggcatcatctaaggcaagtgtatgacttta  
 gagtcgggagaaatttgcgcctgagctagaaatgcactagcctaccattatcacaagagcaagtcagtgacagaaacagttctctgaccgccagtg  
 cagtgccctcccacttgatcaatcagtcattaaggctcactggcaagcccttcgacttcttccctctccggcactagcttccctaaagtcgactc  
 tgtgaaatacctgctaattcttactcgaaccagagtttgcacctcggaaacagtccttgcaccatcttgggaccgattcgtcctgctgattcc  
 ggcaactcgagggggcgggttgggtggaacccacccaccaggccctctcaatcccacacgggtgtccacccttgcccgcaggacggcggcccgaa  
 gtgacgtagtggaagcgggaagtggtgtagtggtgcccacttctggtgttggaggccgggttgggggtggtgcgattgtgtgggacggctcggggc  
 agcccagcagcggctgaccctctgcctcgggggaaggagtcgcccaggcggcggctcatgaccgagtaacaagcccaggtgcccctcggccaccg  
 gacgacgtcccagggcgtacgcaccctcgcgcgcggttcgcccactaccocgccacgcgccacaccgctcgatccggaccgccacatcgagcg  
 ggtcaccgagctgcaagaactcttctcaccgcgctcgggctcgacatcggcaaggtgtgggtcgggacgacggcggcggcggctggcggctgga  
 ccacgcccggagagcgtcgaagcggggcggtgttcgcccagatcggcccgcgcatggccgagttgagcgggtcccggtggccgagcaacag  
 atggaaggcctcctggcggcaccggcccaggagcccgcgtggttctgcccaccgctcggagctctcggccgaccaccagggcaagggctcggg  
 cagcggcgtcgtgctcccggagtgaggcggcggagcgcgcgggggtgccgccttctggagacctcggcggccgcaacctccccttctacg  
 agcggctcggctcaccgctcaccgcccagctcgaggtgccgaaggacggcgcacctggtgcatgaccgcaagcccgggtgcccgcagcggcgcc  
 accaacttcagcctgctgaagcaggccggcgagctggaggagaaccccggccccatggtgagcaaggcggagagctgttcaccgggggtggtgcc  
 catcctggtcgagctggacggcagctaaacggccacaagttcagcgtgtccggcgaggcggagggcgatgccacctacggcaagctgacctga  
 agttcatctgcaccaccggcaagctgcccgtgcccgtgcccaccctcgtgaccacctgacctacggcgtgcaagtgcttcagccgctaccccgac  
 cacatgaagcagcagcacttctcaagtccgcatgcccgaaggctacgtccaggagcgcaccatcttctcaaggacgacggcaactacaagac  
 ccgcccggaggtgaagttcagggcgacacctgggtaaccgcatcgagctgaagggcatcgacttcaaggaggacggcaacatcctggggcaca  
 agctggagtacaactacaacagccacaacgtctatatcatggccgacaagcagaagaacggcatcaaggtgaacttcaagatccgccacaacatc  
 gaggacggcagcgtgacgtcgcggaccactaccagcagaacaccccctcggcgacggcccccgtgctgctgcccgaaccactacctgagcac  
 ccagtcgccctgagcaaaagaccccacgagaagcggcatcacatggtcctgctggagttcgtgaccgcccgggatcactctcggcatggacg  
 agctgtacaagtcgggaatggcgggtgctggagagccagctcaa~~aa~~gatggt~~ca~~gcaaggtgaggctgacgacgctcgcctcccagggcgcgc  
 caccgctccctcggcgcctgtcagttccgtcccggcccagccaagcaagcttcccagacggcgggaagcccgggtgcagtccttagcgaact  
 cctcagaaccccggcccggcctgtcgcctggtcgggaatcccctacgggagctgggaggggtgggggacggcgacagtcaacaaaggcgt  
 ggagcggaggtacctgacacctgcccaccocgcctcctctcttccactgagtttggagctgtctgtggggcagtgtagttttctggttgtt  
 ttataaacacaaaggatcatacttagttgtagatctgaggcaatcctctactcctgtcccaatctagggatcctccagctcttagccttct  
 tttgcccagcccagagagtggtggcctttcagttttgtattctccagaaaagaagcgaataaccagtccttactgcccaggtgaaataca  
 taccattaccatttcagggttttctaagagtaactacttttaagtgtagcttcttataacgcgtatttatgttggcttgagcttaattatgat  
 cttcacggctcaag

**Figure S1. Guide RNA and HDR donor template sequences for GFP-Tsg101 knock-in.** (A) Tsg101 sgRNA and its target site in Tsg101 Exon 1. The protospacer sequence is underlined and the protospacer adjacent motif (PAM) is *italicized*. The Cas9 nuclease cuts the DNA 3-4 nucleotides upstream of the PAM (\*). (B) Annotated sequence of the GFP-Tsg101 HDR template, containing a PuroR-P2A-EGFP cassette flanked by homology regions matching the genomic DNA on either side of the target site.

|                              |                                                                                                                                                                                                                              |                                                                      |
|------------------------------|------------------------------------------------------------------------------------------------------------------------------------------------------------------------------------------------------------------------------|----------------------------------------------------------------------|
| <b>WT reference sequence</b> | <p>ATGGCGGTGTCGGAGAGCCAGCTCAAGAAAATGGTGT*CCAAGGTGAGGCTGCGACGCGCTCGCTCCCAG</p> <p><b>M A V S E S Q L K K M V *S K</b></p>                                                                                                     | <p>(*) sgRNA target site.<br/><b>Translation: Tsg101 Exon 1.</b></p> |
| <b>KI HeLa A</b>             | <p>ATGGCGGTGTCGGAGAGCCAGCTCAAGA*TGAGGCTGCGACGCGCTCGCTCCCAG</p> <p><b>M A V S E S Q L K M R L R R A R L P</b></p> 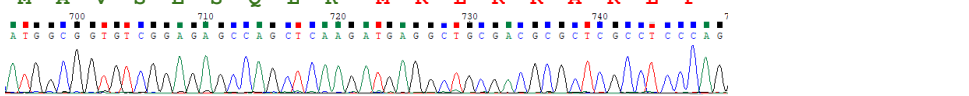                          | <p><b>* 15 nt deletion removes splice site.</b></p>                  |
| <b>KI HeLa B</b>             | <p>ATGGCGGTGTCGGAGAGCCAGCTCAAGAAAATGGTGTGCCAAGGTGAGGCTGCGACGCGCTCGCTCCCAG</p> <p><b>M A V S E S Q L K K M V C Q G E A A T R S P P</b></p>  | <p><b>1 nt insertion causes frameshift.</b></p>                      |
| <b>KI Jurkat A</b>           | <p>ATGGCGGTGTCGGAGAGCCAGCTCAAGAAAATGGTGTAGCCTCAAGGTGAGGCTGCGACGCGCTCGCTCCCAG</p> <p><b>M A V S E S Q L K K M V -</b></p>                   | <p><b>5 nt insertion introduces premature stop codon.</b></p>        |
| <b>KI Jurkat B</b>           | <p>ATGGCGGTGTCGGAGAGCCAGCTCAAGAAAATGGTGTAGCCTCAAGGTGAGGCTGCGACGCGCTCGCTCCCAG</p> <p><b>M A V S E S Q L K K M V -</b></p>                   | <p><b>5 nt insertion introduces premature stop codon.</b></p>        |

**Figure S2. GFP-Tsg101 knock-in cell lines have knockout indels on their untagged Tsg101 alleles.** To sequence the non-knock-in alleles of Tsg101, PCR was performed on genomic DNA of the knock-in cell lines with primers that anneal to the genomic DNA on either side of the Tsg101 target site. The primers could also anneal to a knock-in allele, but that would give a much larger PCR amplicon, which was excluded by limiting the extension time and by gel-purifying the band at the predicted size for a non-knock-in allele. Sanger sequencing of the PCR products showed indels that knock-out expression of Tsg101. The indels, and their effects on the translated protein sequence, are indicated in red. This confirms that the knock-in cell lines have no functional alleles for untagged Tsg101.

**(A) 5' knock-in junction**

|                |     |                                                                                |                          |
|----------------|-----|--------------------------------------------------------------------------------|--------------------------|
| HumanGenomeRef | 1   | GATTCGTCCTGCTGATTCCGGCACTCGAGGGCGGGTGGTTGGAACCCACCC                            | CCAGGCCCTCTCAATCCCACACGG |
| DonorPlasmid   | 1   | GATTCGTCCTGCTGATTCCGGCACTCGAGGGCGGGTGGTTGGAACCCACCC                            | CCAGGCCCTCTCAATCCCACACGG |
| WT_HeLa        | 1   | GATTCGTCCTGCTGATTCCGGCACTCGAGGGCGGGTGGTTGGAACCCACCCGCCAGGCCCTCTCAATCCCACACGG   |                          |
| KI_HeLa_A      | 1   | GATTCGTCCTGCTGATTCCGGCACTCGAGGGCGGGTGGTTGGAACCCACCCGCCAGGCCCTCTCAATCCCACACGG   |                          |
| KI_HeLa_B      | 1   | GATTCGTCCTGCTGATTCCGGCACTCGAGGGCGGGTGGTTGGAACCCACCCGCCAGGCCCTCTCAATCCCACACGG   |                          |
| WT_Jurkat      | 1   | GATTCGTCCTGCTGATTCCGGCACTCGAGGGCGGGTGGTTGGAACCCACCCGCCAGGCCCTCTCAATCCCACACGG   |                          |
| KI_Jurkat_A    | 1   | GATTCGTCCTGCTGATTCCGGCACTCGAGGGCGGGTGGTTGGAACCCACCCGCCAGGCCCTCTCAATCCCACACGG   |                          |
| KI_Jurkat_B    | 1   | GATTCGTCCTGCTGATTCCGGCACTCGAGGGCGGGTGGTTGGAACCCACCCGCCAGGCCCTCTCAATCCCACACGG   |                          |
| HumanGenomeRef | 81  | TGTCACCCCTTGCCCGCAGGACGGCGGCCCGGAAGTACGTAGTGAAGCGGAAGTGGTGTAGTGGTGCCGACTTCCTGT |                          |
| DonorPlasmid   | 81  | TGTCACCCCTTGCCCGCAGGACGGCGGCCCGGAAGTACGTAGTGAAGCGGAAGTGGTGTAGTGGTGCCGACTTCCTGT |                          |
| WT_HeLa        | 81  | TGTCACCCCTTGCCCGCAGGACGGCGGCCCGGAAGTACGTAGTGAAGCGGAAGTGGTGTAGTGGTGCCGACTTCCTGT |                          |
| KI_HeLa_A      | 81  | TGTCACCCCTTGCCCGCAGGACGGCGGCCCGGAAGTACGTAGTGAAGCGGAAGTGGTGTAGTGGTGCCGACTTCCTGT |                          |
| KI_HeLa_B      | 81  | TGTCACCCCTTGCCCGCAGGACGGCGGCCCGGAAGTACGTAGTGAAGCGGAAGTGGTGTAGTGGTGCCGACTTCCTGT |                          |
| WT_Jurkat      | 81  | TGTCACCCCTTGCCCGCAGGACGGCGGCCCGGAAGTACGTAGTGAAGCGGAAGTGGTGTAGTGGTGCCGACTTCCTGT |                          |
| KI_Jurkat_A    | 81  | TGTCACCCCTTGCCCGCAGGACGGCGGCCCGGAAGTACGTAGTGAAGCGGAAGTGGTGTAGTGGTGCCGACTTCCTGT |                          |
| KI_Jurkat_B    | 81  | TGTCACCCCTTGCCCGCAGGACGGCGGCCCGGAAGTACGTAGTGAAGCGGAAGTGGTGTAGTGGTGCCGACTTCCTGT |                          |
| HumanGenomeRef | 161 | TGTTTGAGGCCGGGTGGGGTGTGCGATTGTGTGGACGGTCTGGGCAGCCAGCAGCGGCTGACCOCTTGCCCTGCGG   |                          |
| DonorPlasmid   | 161 | TGTTTGAGGCCGGGTGGGGTGTGCGATTGTGTGGACGGTCTGGGCAGCCAGCAGCGGCTGACCOCTTGCCCTGCGG   |                          |
| WT_HeLa        | 161 | TGTTTGAGGCCGGGTGGGGTGTGCGATTGTGTGGACGGTCTGGGCAGCCAGCAGCGGCTGACCOCTTGCCCTGCGG   |                          |
| KI_HeLa_A      | 161 | TGTTTGAGGCCGGGTGGGGTGTGCGATTGTGTGGACGGTCTGGGCAGCCAGCAGCGGCTGACCOCTTGCCCTGCGG   |                          |
| KI_HeLa_B      | 161 | TGTTTGAGGCCGGGTGGGGTGTGCGATTGTGTGGACGGTCTGGGCAGCCAGCAGCGGCTGACCOCTTGCCCTGCGG   |                          |
| WT_Jurkat      | 161 | TGTTTGAGGCCGGGTGGGGTGTGCGATTGTGTGGACGGTCTGGGCAGCCAGCAGCGGCTGACCOCTTGCCCTGCGG   |                          |
| KI_Jurkat_A    | 161 | TGTTTGAGGCCGGGTGGGGTGTGCGATTGTGTGGACGGTCTGGGCAGCCAGCAGCGGCTGACCOCTTGCCCTGCGG   |                          |
| KI_Jurkat_B    | 161 | TGTTTGAGGCCGGGTGGGGTGTGCGATTGTGTGGACGGTCTGGGCAGCCAGCAGCGGCTGACCOCTTGCCCTGCGG   |                          |
| HumanGenomeRef | 241 | GGAAGGGAGTCGCCAGGCGGCCGTCATG                                                   | -----                    |
| DonorPlasmid   | 241 | GGAAGGGAGTCGCCAGGCGGCCGTCATGACCCGAGTACAAGCCC                                   | -----                    |
| WT_HeLa        | 241 | GGAAGGGAGTCGCCAGGCGGCCGTCATG                                                   | -----                    |
| KI_HeLa_A      | 241 | GGAAGGGAGTCGCCAGGCGGCCGTCATGACCCGAGTACAAGCCC                                   | -----                    |
| KI_HeLa_B      | 241 | GGAAGGGAGTCGCCAGGCGGCCGTCATGACCCGAGTACAAGCCC                                   | -----                    |
| WT_Jurkat      | 241 | GGAAGGGAGTCGCCAGGCGGCCGTCATG                                                   | -----                    |
| KI_Jurkat_A    | 241 | GGAAGGGAGTCGCCAGGCGGCCGTCATGACCCGAGTACAAGCCC                                   | -----                    |
| KI_Jurkat_B    | 241 | GGAAGGGAGTCGCCAGGCGGCCGTCATGACCCGAGTACAAGCCC                                   | -----                    |

**(B) 3' knock-in junction**

|                |     |                                                                                 |                             |     |                |
|----------------|-----|---------------------------------------------------------------------------------|-----------------------------|-----|----------------|
| HumanGenomeRef | 1   | -----                                                                           | ATGGCGGTGTCGGAGAGCCAGCTCAA  | AA  | ATGGTGTCCAA    |
| DonorPlasmid   | 1   | GGGATCACCTCTCGGCATGGACGAGCTGTACAAGTCGGGA                                        | AATGGCGGTGTCGGAGAGCCAGCTCAA | AAA | AAGATGGTGTCCAA |
| WT_HeLa        | 1   | -----                                                                           | ATGGCGGTGTCGGAGAGCCAGCTCAA  | AA  | ATGGTGTCCAA    |
| KI_HeLa_A      | 1   | GGGATCACCTCTCGGCATGGACGAGCTGTACAAGTCGGGA                                        | AATGGCGGTGTCGGAGAGCCAGCTCAA | AAA | AAGATGGTGTCCAA |
| KI_HeLa_B      | 1   | GGGATCACCTCTCGGCATGGACGAGCTGTACAAGTCGGGA                                        | AATGGCGGTGTCGGAGAGCCAGCTCAA | AAA | AAGATGGTGTCCAA |
| WT_Jurkat      | 1   | -----                                                                           | ATGGCGGTGTCGGAGAGCCAGCTCAA  | AA  | ATGGTGTCCAA    |
| KI_Jurkat_A    | 1   | GGGATCACCTCTCGGCATGGACGAGCTGTACAAGTCGGGA                                        | AATGGCGGTGTCGGAGAGCCAGCTCAA | AAA | AAGATGGTGTCCAA |
| KI_Jurkat_B    | 1   | GGGATCACCTCTCGGCATGGACGAGCTGTACAAGTCGGGA                                        | AATGGCGGTGTCGGAGAGCCAGCTCAA | AAA | AAGATGGTGTCCAA |
| HumanGenomeRef | 42  | GTGAGGCTGCGACGCGCTCGCCTCCCAGGGCGCGCCACCCTCCCTTCCGCGCCCTGTCGAGTCCGTCGCCGCCAGC    |                             |     |                |
| DonorPlasmid   | 81  | GTGAGGCTGCGACGCGCTCGCCTCCCAGGGCGCGCCACCCTCCCTTCCGCGCCCTGTCGAGTCCGTCGCCGCCAGC    |                             |     |                |
| WT_HeLa        | 42  | GTGAGGCTGCGACGCGCTCGCCTCCCAGGGCGCGCCACCCTCCCTTCCGCGCCCTGTCGAGTCCGTCGCCGCCAGC    |                             |     |                |
| KI_HeLa_A      | 81  | GTGAGGCTGCGACGCGCTCGCCTCCCAGGGCGCGCCACCCTCCCTTCCGCGCCCTGTCGAGTCCGTCGCCGCCAGC    |                             |     |                |
| KI_HeLa_B      | 81  | GTGAGGCTGCGACGCGCTCGCCTCCCAGGGCGCGCCACCCTCCCTTCCGCGCCCTGTCGAGTCCGTCGCCGCCAGC    |                             |     |                |
| WT_Jurkat      | 42  | GTGAGGCTGCGACGCGCTCGCCTCCCAGGGCGCGCCACCCTCCCTTCCGCGCCCTGTCGAGTCCGTCGCCGCCAGC    |                             |     |                |
| KI_Jurkat_A    | 81  | GTGAGGCTGCGACGCGCTCGCCTCCCAGGGCGCGCCACCCTCCCTTCCGCGCCCTGTCGAGTCCGTCGCCGCCAGC    |                             |     |                |
| KI_Jurkat_B    | 81  | GTGAGGCTGCGACGCGCTCGCCTCCCAGGGCGCGCCACCCTCCCTTCCGCGCCCTGTCGAGTCCGTCGCCGCCAGC    |                             |     |                |
| HumanGenomeRef | 122 | CAAGCAAGCTTCCCAGACGGGCGGAAGCCCGGTGCAGTCTTAGCGACCTCCTCAGAACCCCGCCCGAGGGCGCTGT    |                             |     |                |
| DonorPlasmid   | 161 | CAAGCAAGCTTCCCAGACGGGCGGAAGCCCGGTGCAGTCTTAGCGACCTCCTCAGAACCCCGCCCGAGGGCGCTGT    |                             |     |                |
| WT_HeLa        | 122 | CAAGCAAGCTTCCCAGACGGGCGGAAGCCCGGTGCAGTCTTAGCGACCTCCTCAGAACCCCGCCCGAGGGCGCTGT    |                             |     |                |
| KI_HeLa_A      | 161 | CAAGCAAGCTTCCCAGACGGGCGGAAGCCCGGTGCAGTCTTAGCGACCTCCTCAGAACCCCGCCCGAGGGCGCTGT    |                             |     |                |
| KI_HeLa_B      | 161 | CAAGCAAGCTTCCCAGACGGGCGGAAGCCCGGTGCAGTCTTAGCGACCTCCTCAGAACCCCGCCCGAGGGCGCTGT    |                             |     |                |
| WT_Jurkat      | 122 | CAAGCAAGCTTCCCAGACGGGCGGAAGCCCGGTGCAGTCTTAGCGACCTCCTCAGAACCCCGCCCGAGGGCGCTGT    |                             |     |                |
| KI_Jurkat_A    | 161 | CAAGCAAGCTTCCCAGACGGGCGGAAGCCCGGTGCAGTCTTAGCGACCTCCTCAGAACCCCGCCCGAGGGCGCTGT    |                             |     |                |
| KI_Jurkat_B    | 161 | CAAGCAAGCTTCCCAGACGGGCGGAAGCCCGGTGCAGTCTTAGCGACCTCCTCAGAACCCCGCCCGAGGGCGCTGT    |                             |     |                |
| HumanGenomeRef | 202 | CGCCTGGTGCGGGAATCCCCGTACGGGAGCTGGGAGGTTGGGGACGGCGACAGTCAACAAAGGCGTGGAGCGGAGGCTA |                             |     |                |
| DonorPlasmid   | 241 | CGCCTGGTGCGGGAATCCCCGTACGGGAGCTGGGAGGTTGGGGACGGCGACAGTCAACAAAGGCGTGGAGCGGAGGCTA |                             |     |                |
| WT_HeLa        | 202 | CGCCTGGTGCGGGAATCCCCGTACGGGAGCTGGGAGGTTGGGGACGGCGACAGTCAACAAAGGCGTGGAGCGGAGGCTA |                             |     |                |
| KI_HeLa_A      | 241 | CGCCTGGTGCGGGAATCCCCGTACGGGAGCTGGGAGGTTGGGGACGGCGACAGTCAACAAAGGCGTGGAGCGGAGGCTA |                             |     |                |
| KI_HeLa_B      | 241 | CGCCTGGTGCGGGAATCCCCGTACGGGAGCTGGGAGGTTGGGGACGGCGACAGTCAACAAAGGCGTGGAGCGGAGGCTA |                             |     |                |
| WT_Jurkat      | 202 | CGCCTGGTGCGGGAATCCCCGTACGGGAGCTGGGAGGTTGGGGACGGCGACAGTCAACAAAGGCGTGGAGCGGAGGCTA |                             |     |                |
| KI_Jurkat_A    | 241 | CGCCTGGTGCGGGAATCCCCGTACGGGAGCTGGGAGGTTGGGGACGGCGACAGTCAACAAAGGCGTGGAGCGGAGGCTA |                             |     |                |
| KI_Jurkat_B    | 241 | CGCCTGGTGCGGGAATCCCCGTACGGGAGCTGGGAGGTTGGGGACGGCGACAGTCAACAAAGGCGTGGAGCGGAGGCTA |                             |     |                |
| HumanGenomeRef | 282 | CCTGACACCTGCGGCCACCCGCCCTCCTCTCTTCCACTGAGTTTGGAGCTGTCTGTGGGG                    |                             |     |                |
| DonorPlasmid   | 321 | CCTGACACCTGCGGCCACCCGCCCTCCTCTCTTCCACTGAGTTTGGAGCTGTCTGTGGGG                    |                             |     |                |
| WT_HeLa        | 282 | CCTGACACCTGCGGCCACCCGCCCTCCTCTCTTCCACTGAGTTTGGAGCTGTCTGTGGGG                    |                             |     |                |
| KI_HeLa_A      | 321 | CCTGACACCTGCGGCCACCCGCCCTCCTCTCTTCCACTGAGTTTGGAGCTGTCTGTGGGG                    |                             |     |                |
| KI_HeLa_B      | 321 | CCTGACACCTGCGGCCACCCGCCCTCCTCTCTTCCACTGAGTTTGGAGCTGTCTGTGGGG                    |                             |     |                |
| WT_Jurkat      | 282 | CCTGACACCTGCGGCCACCCGCCCTCCTCTCTTCCACTGAGTTTGGAGCTGTCTGTGGGG                    |                             |     |                |
| KI_Jurkat_A    | 321 | CCTGACACCTGCGGCCACCCGCCCTCCTCTCTTCCACTGAGTTTGGAGCTGTCTGTGGGG                    |                             |     |                |
| KI_Jurkat_B    | 321 | CCTGACACCTGCGGCCACCCGCCCTCCTCTCTTCCACTGAGTTTGGAGCTGTCTGTGGGG                    |                             |     |                |

**Figure S3. GFP-Tsg101 knock-in alleles show precise insertion.** (A) 5' and (B) 3' homology junctions of the KI alleles were amplified by PCR from genomic DNA, analyzed by Sanger sequencing, and compared to the human genome reference sequence, donor plasmid sequence, and sequences from the parental (WT) cell lines. Non-coding regions (5'UTR and intron) are shown in black/white text, **Tsg101 exon 1 in blue**, **PuroR in red**, and **GFP in green**. The results show precise integration of the PuroR-P2A-GFP insert, with no abnormalities except for several single-nucleotide polymorphisms in non-coding regions, some of which were also found in the parental lines. The discrepancies in the Tsg101 coding sequence in the alignment are the silent mutations intentionally introduced to the donor plasmid to prevent CRISPR from cutting the knock-in allele.

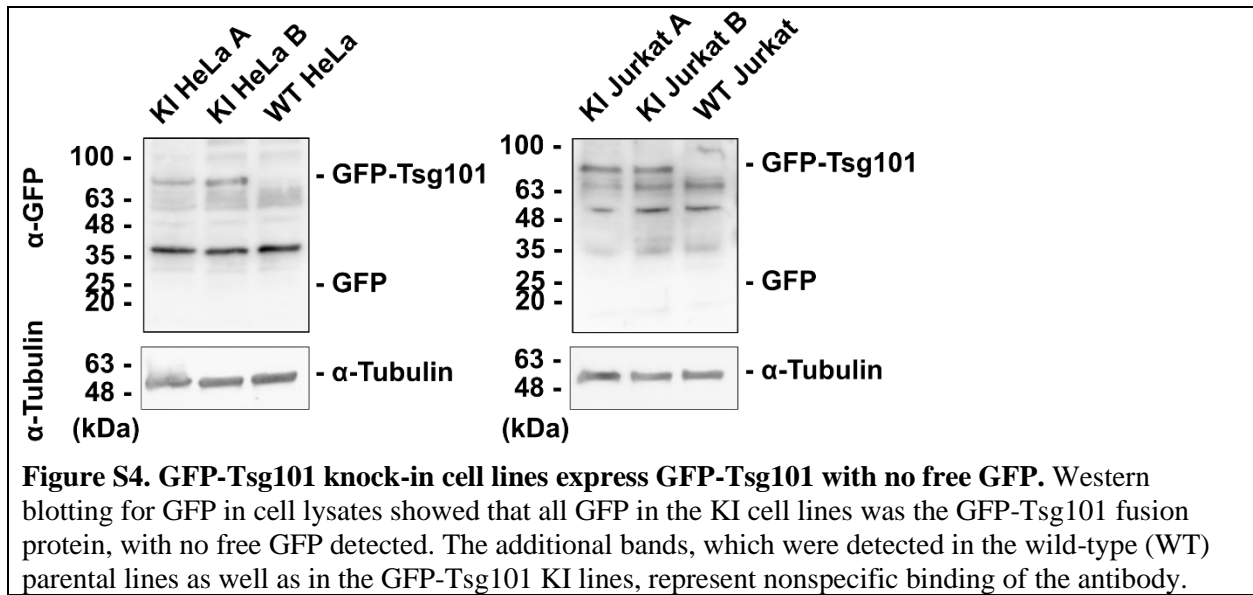

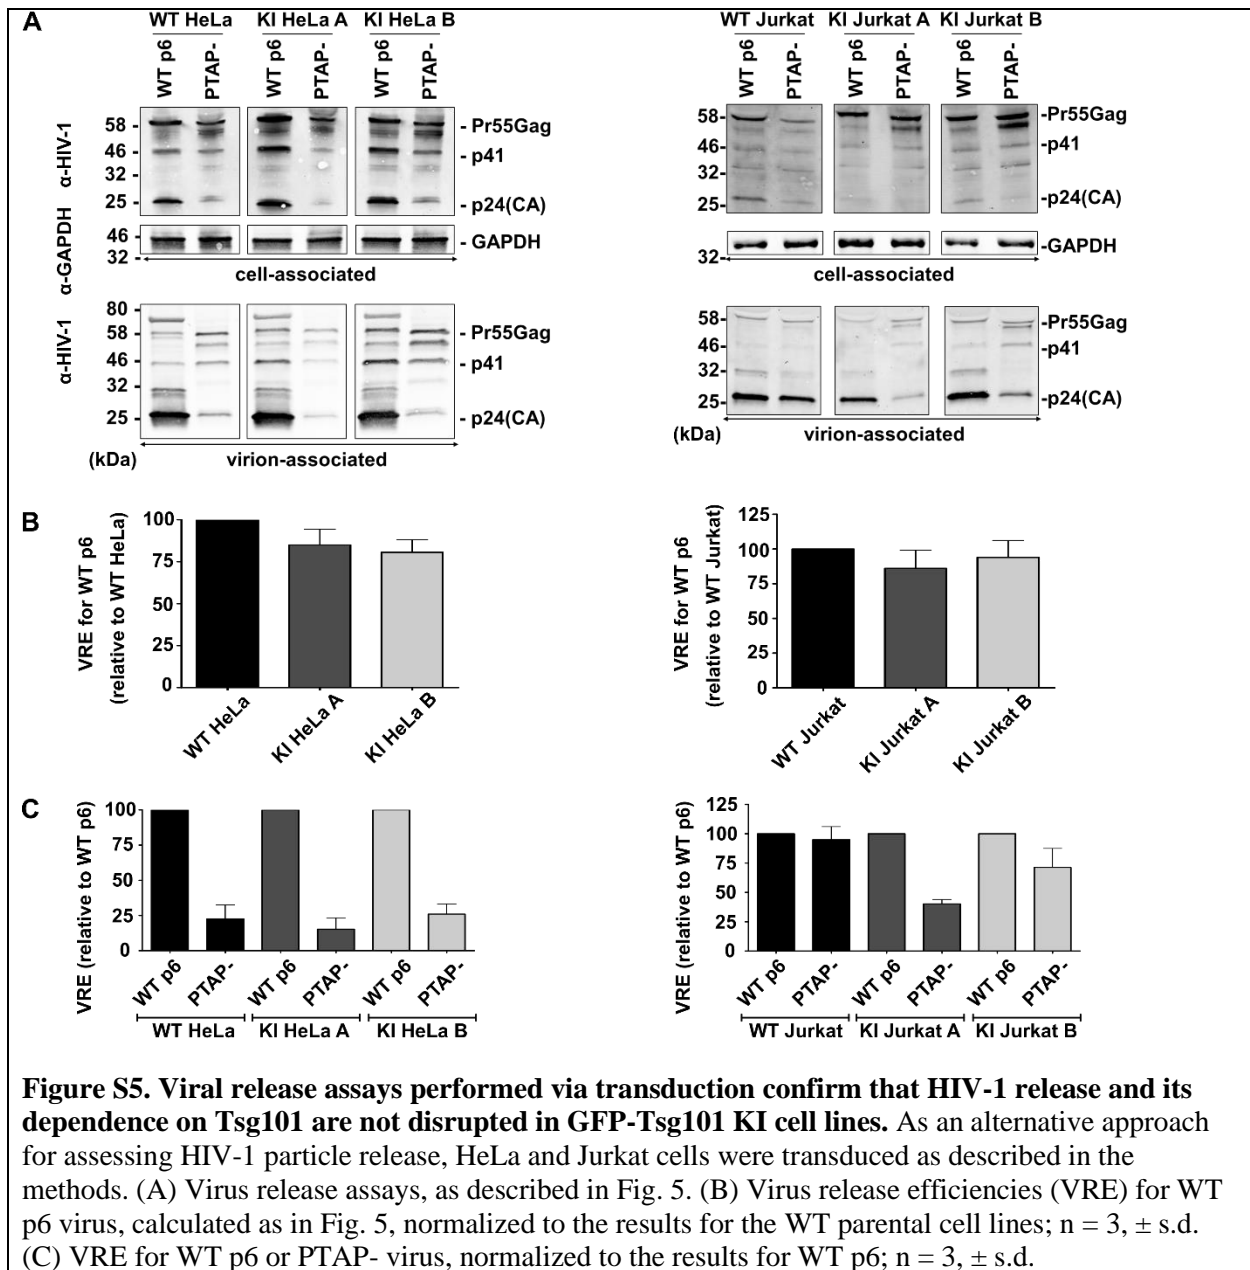

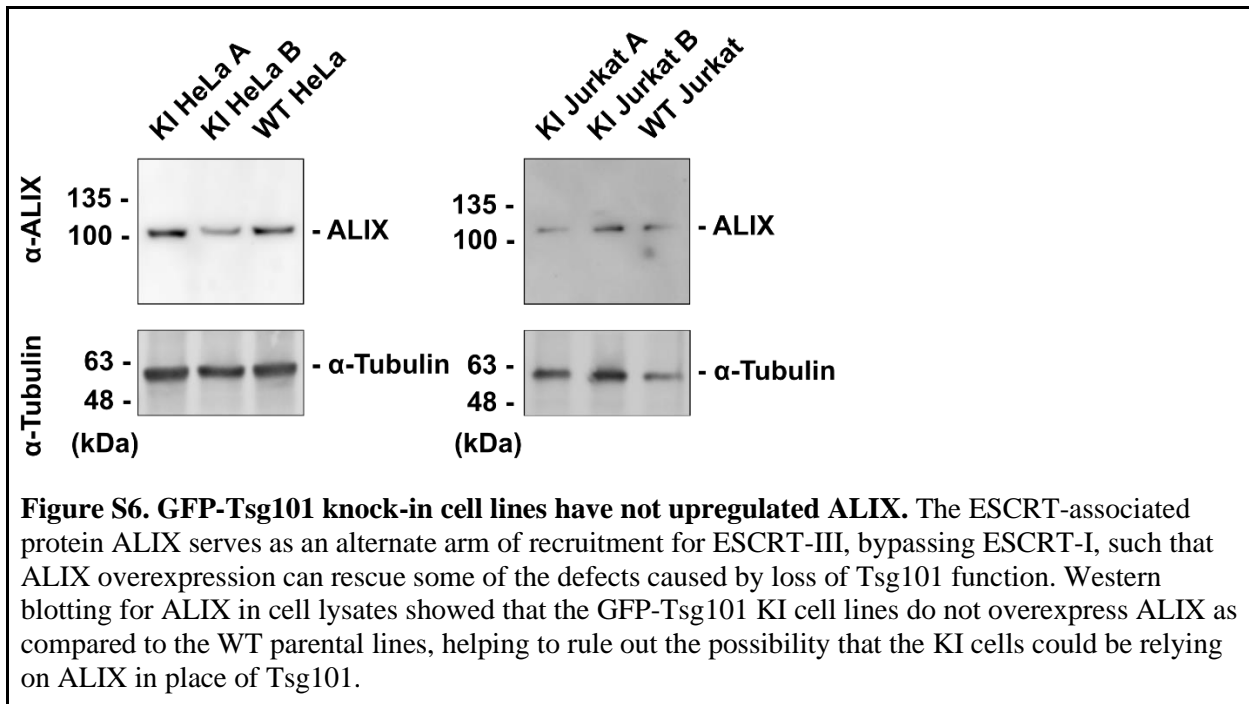



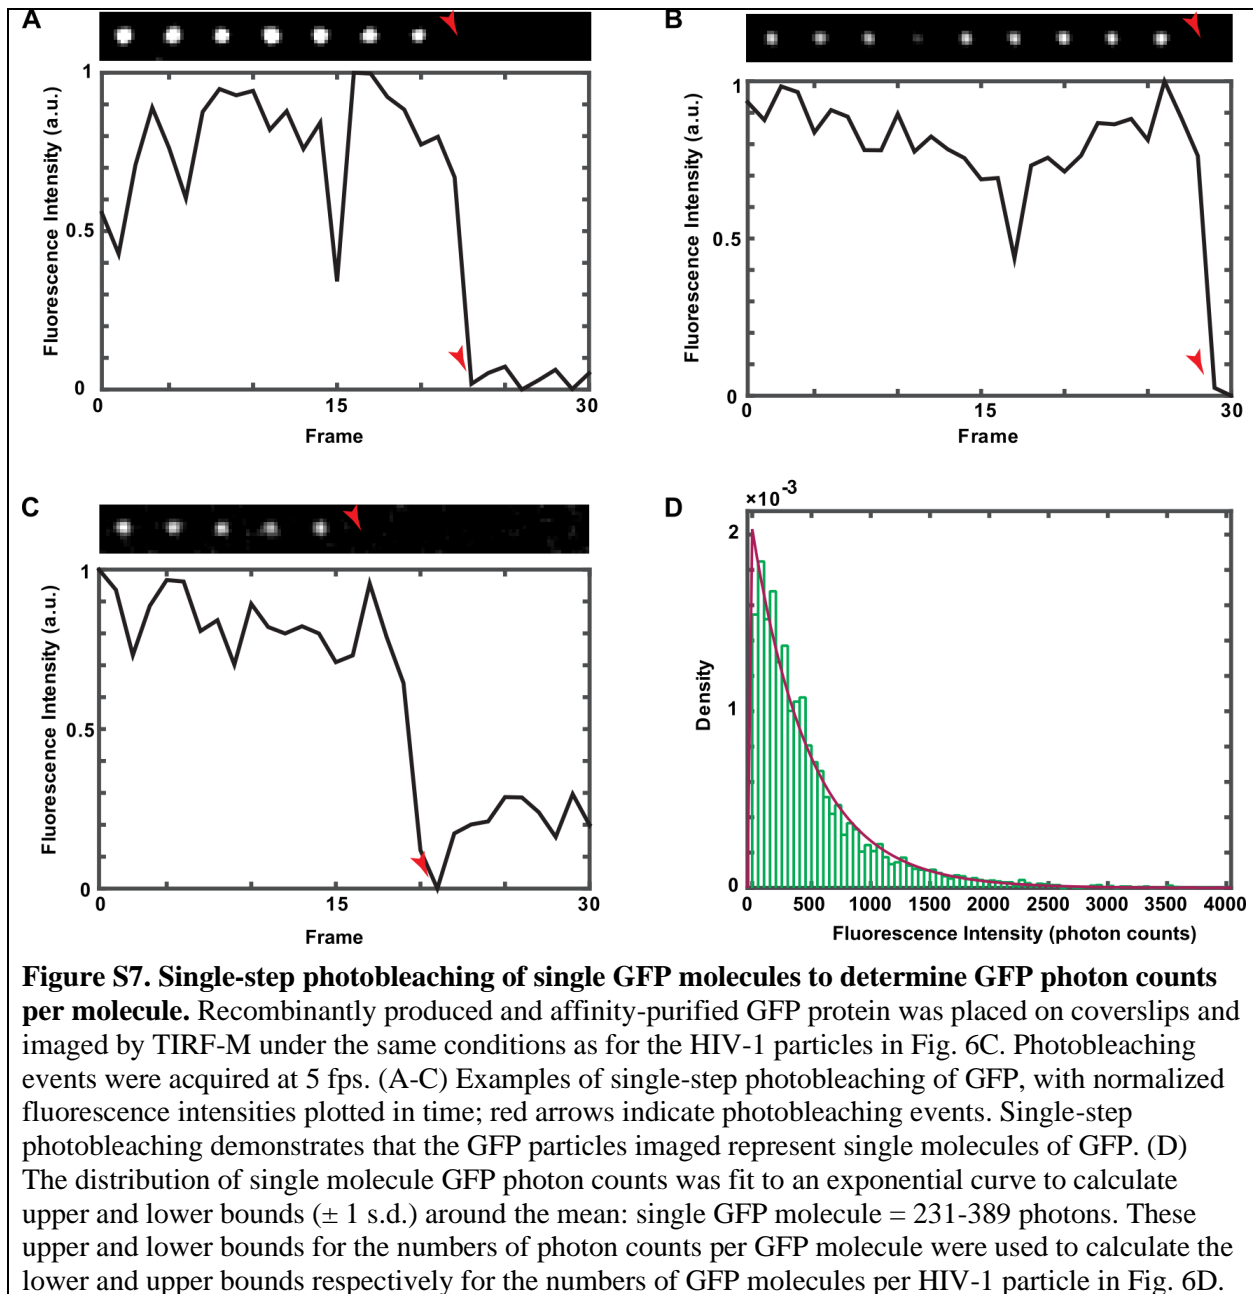

Supplement: supp_RA119.009372_152856_2_supp_394301_pxrqp9.pdf [file supp_RA119.009372_152856_2_supp_394301_pxrqp9.pdf]
